# Supplementary material
Source: PubMed Central journal article supplement (PMC6031383)
Supplement: joces-131-213314-s1.pdf [file joces-131-213314-s1.pdf]

C<sub>2</sub>-ceramide

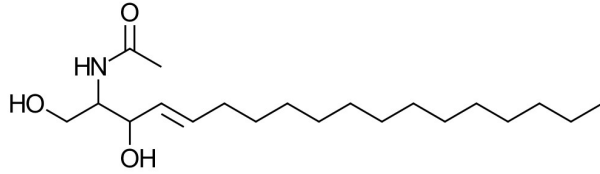

dihydro-C<sub>2</sub>-ceramide

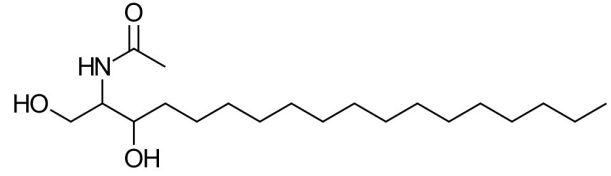

FTY720

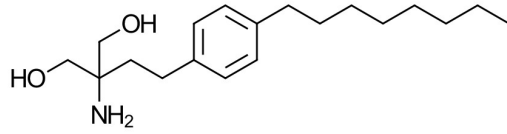

893-lactam

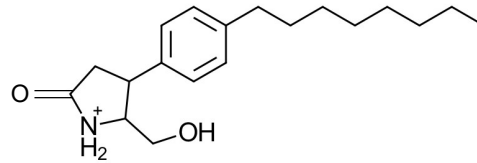

893

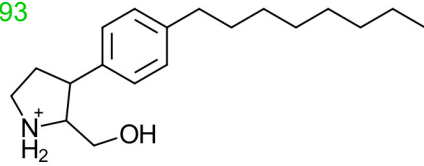

**Supplemental Figure 1: Sphingolipids used in this study. Related to Figures 1-8.** Structures of sphingolipids used in these studies.

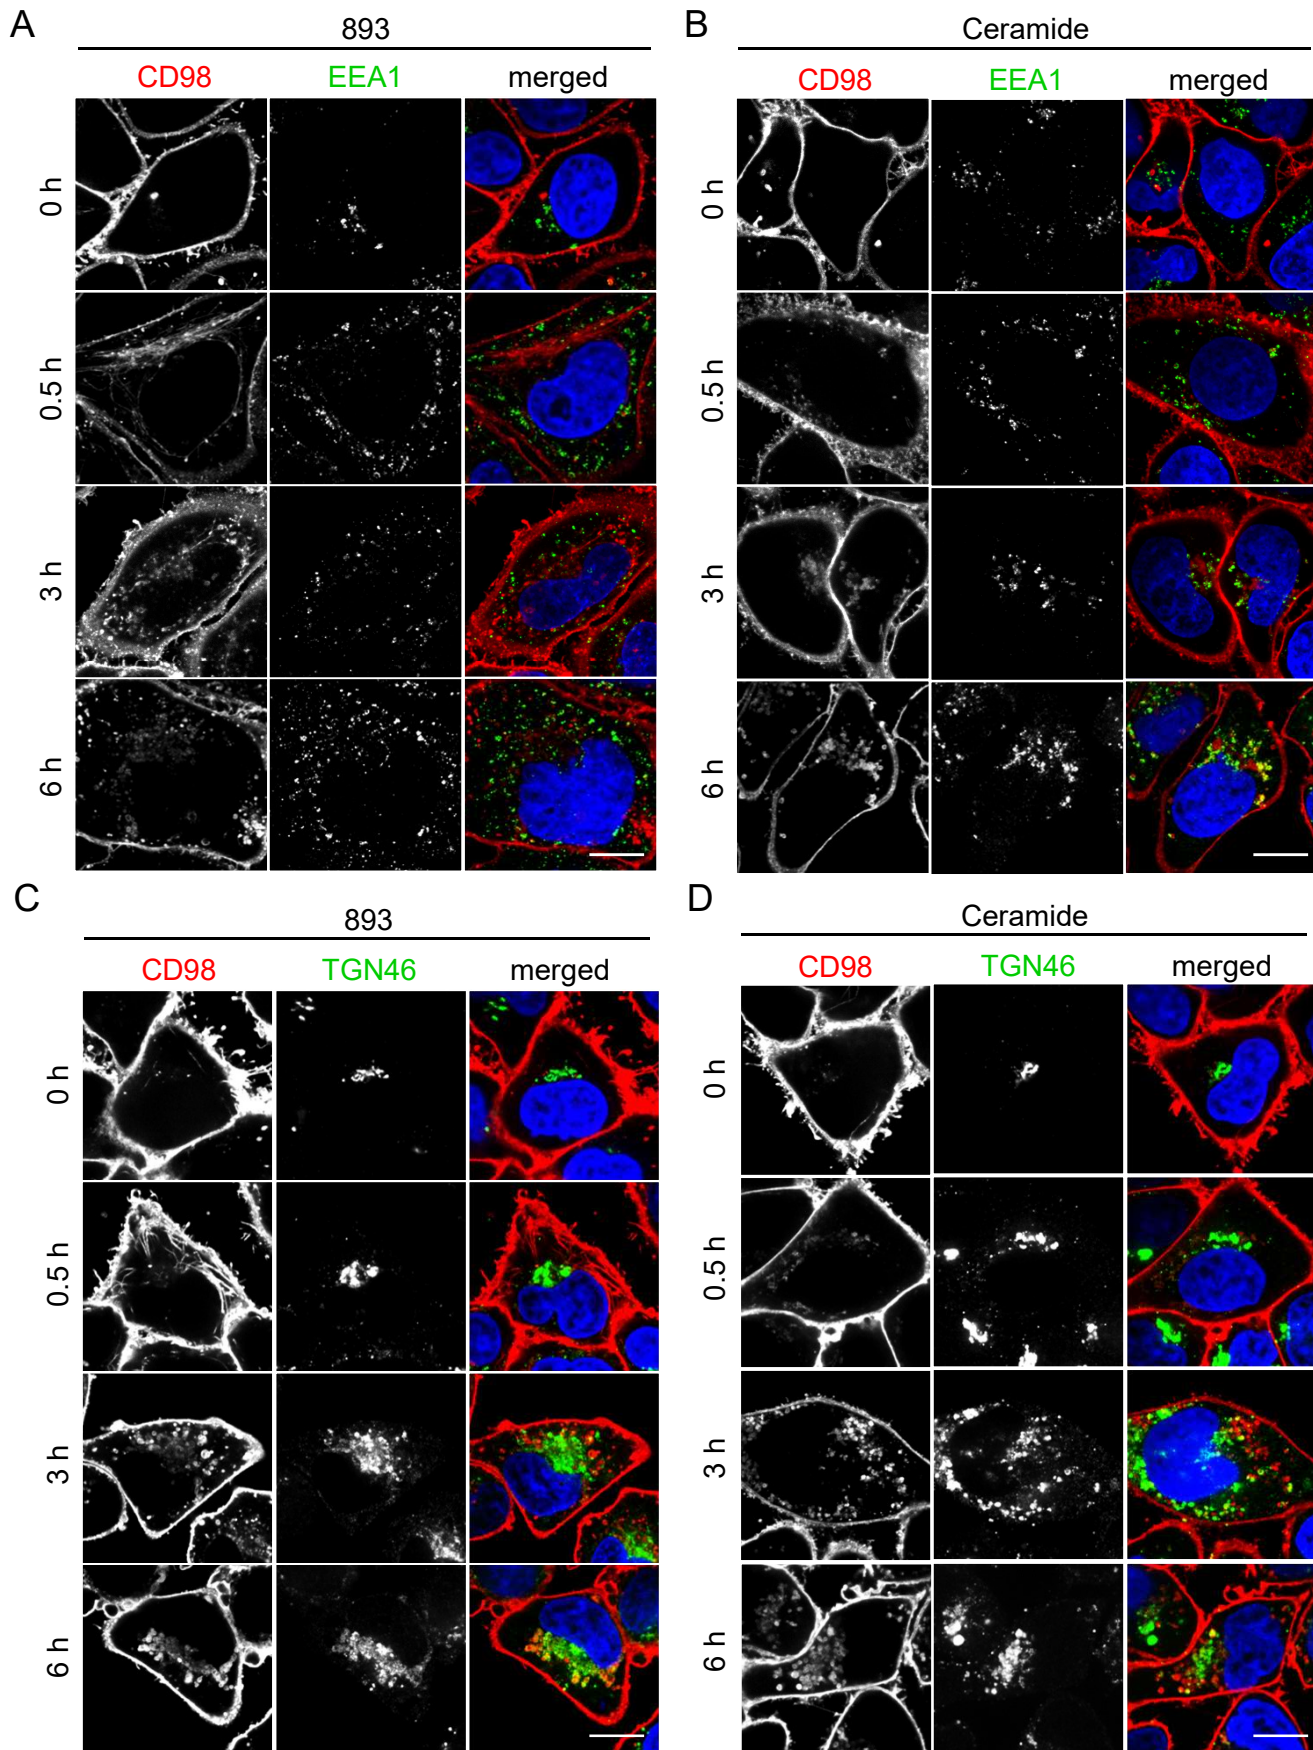

**Supplemental Figure 2: Transporters do not enter the early endosome or colocalize with TGN46 until late timepoints. Related to Figure 1.** (A-B) HeLa cells were treated with 893 (10 μM) or C<sub>2</sub>-ceramide (50 μM) for 0.5, 3, or 6 h then stained for CD98 and EEA1. (C-D) HeLa cells were treated as in A&B and stained for CD98 and TGN46. Scale bar, 10 μm.

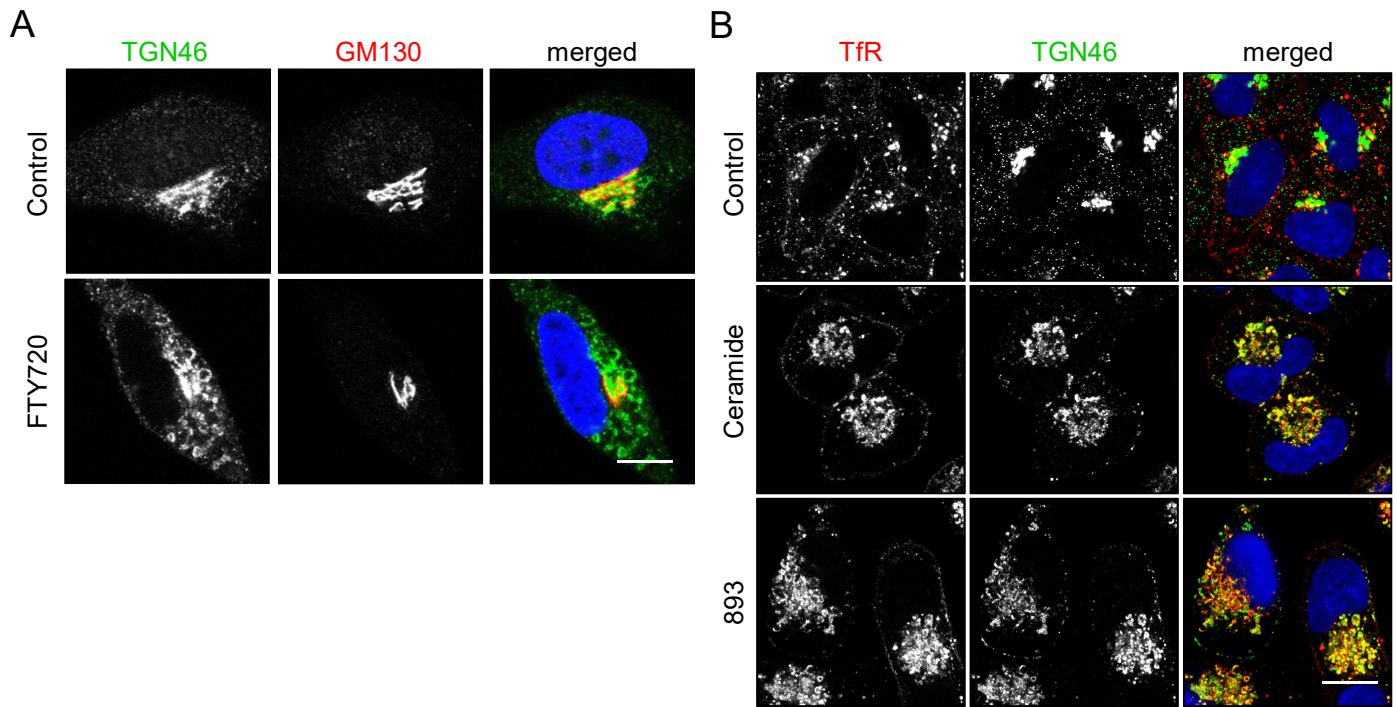

**Supplemental Figure 3: TGN46 is mislocalized in sphingolipid-treated cells. Related to Figure 1.** (A) HeLa cells were treated with FTY720 (5  $\mu$ M) for 12 h and stained for TGN46 and GM130. (B) HeLa cells were treated with vehicle, C<sub>2</sub>-ceramide (50  $\mu$ M), or 893 (10  $\mu$ M) for 12 h and stained for TfR and TGN46. Scale bar, 10  $\mu$ m.



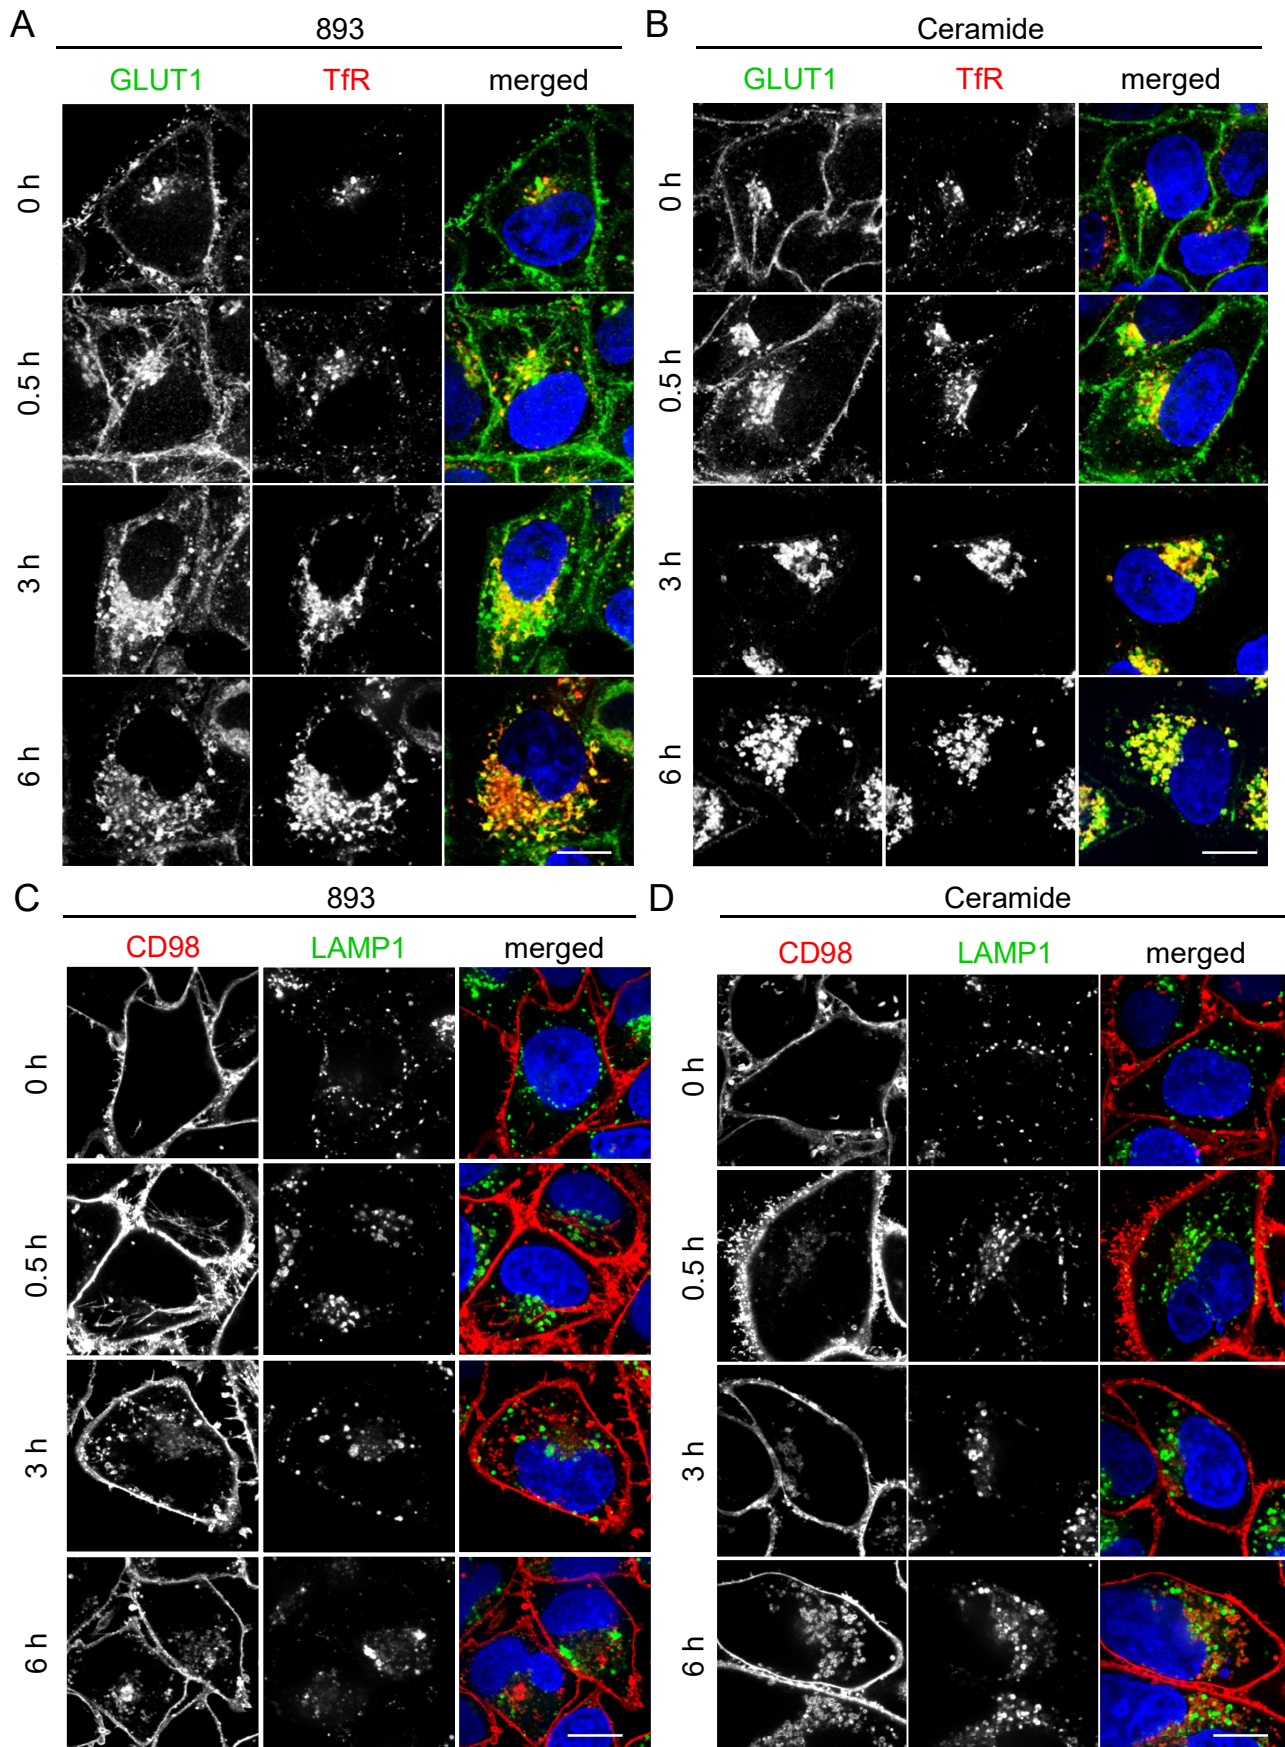

**Supplemental Figure 4: Nutrient transporters are trapped with other recycled cargo at late timepoints. Related to Figure 1.** (A-B) HeLa cells were treated with 893 (10  $\mu$ M) or C<sub>2</sub>-ceramide (50  $\mu$ M) for 0.5, 3, or 6 h then stained for GLUT1 and the transferrin receptor (Tfr). (C-D) HeLa cells were treated as in A&B and stained for CD98 and LAMP1. Scale bar, 10  $\mu$ m.



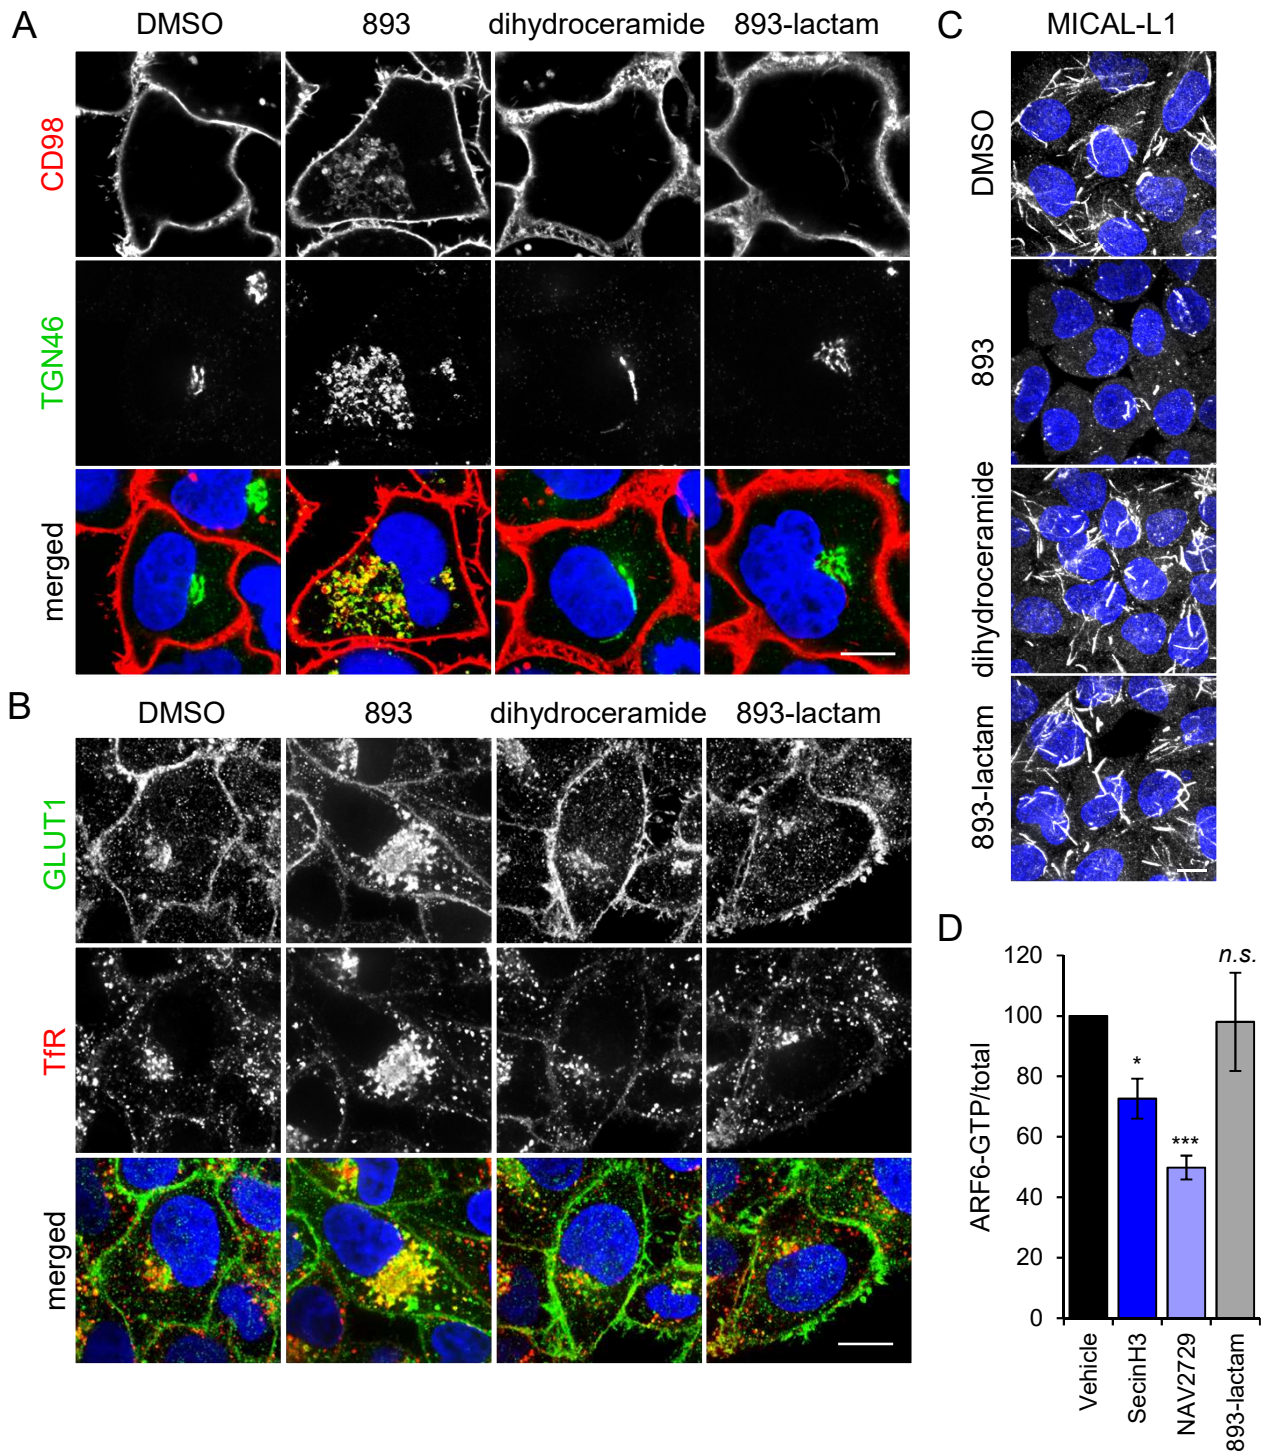

**Supplemental Figure 5: Structurally-similar sphingolipids that do not activate PP2A or reduce ARF6-GTP levels fail to cause nutrient transporter trafficking defects. Related to Figure 5.** (A-C) HeLa cells were treated with 893 (10  $\mu$ M), C<sub>2</sub>-dihydroceramide (50  $\mu$ M), or 893-lactam (10  $\mu$ M) for 12 h and then stained for CD98 and TGN46 (in A) or for GLUT1 and TfR (in B) or for MICAL-L1 (in C). (D) ARF6-GTP levels normalized to total in HeLa cells treated with SecinH3 (30  $\mu$ M), NAV2729 (25  $\mu$ M), or 893-lactam (10  $\mu$ M) for 3 h. Means  $\pm$  SEM shown,  $n \geq 4$  for SecinH3 and NAV2729;  $n = 2$  for 893-lactam. Using ordinary one-way ANOVA, n.s. = not significant; \* =  $p \leq 0.05$ ; \*\*\* =  $p \leq 0.001$ . Dunnett's test was used to correct for multiple comparisons.



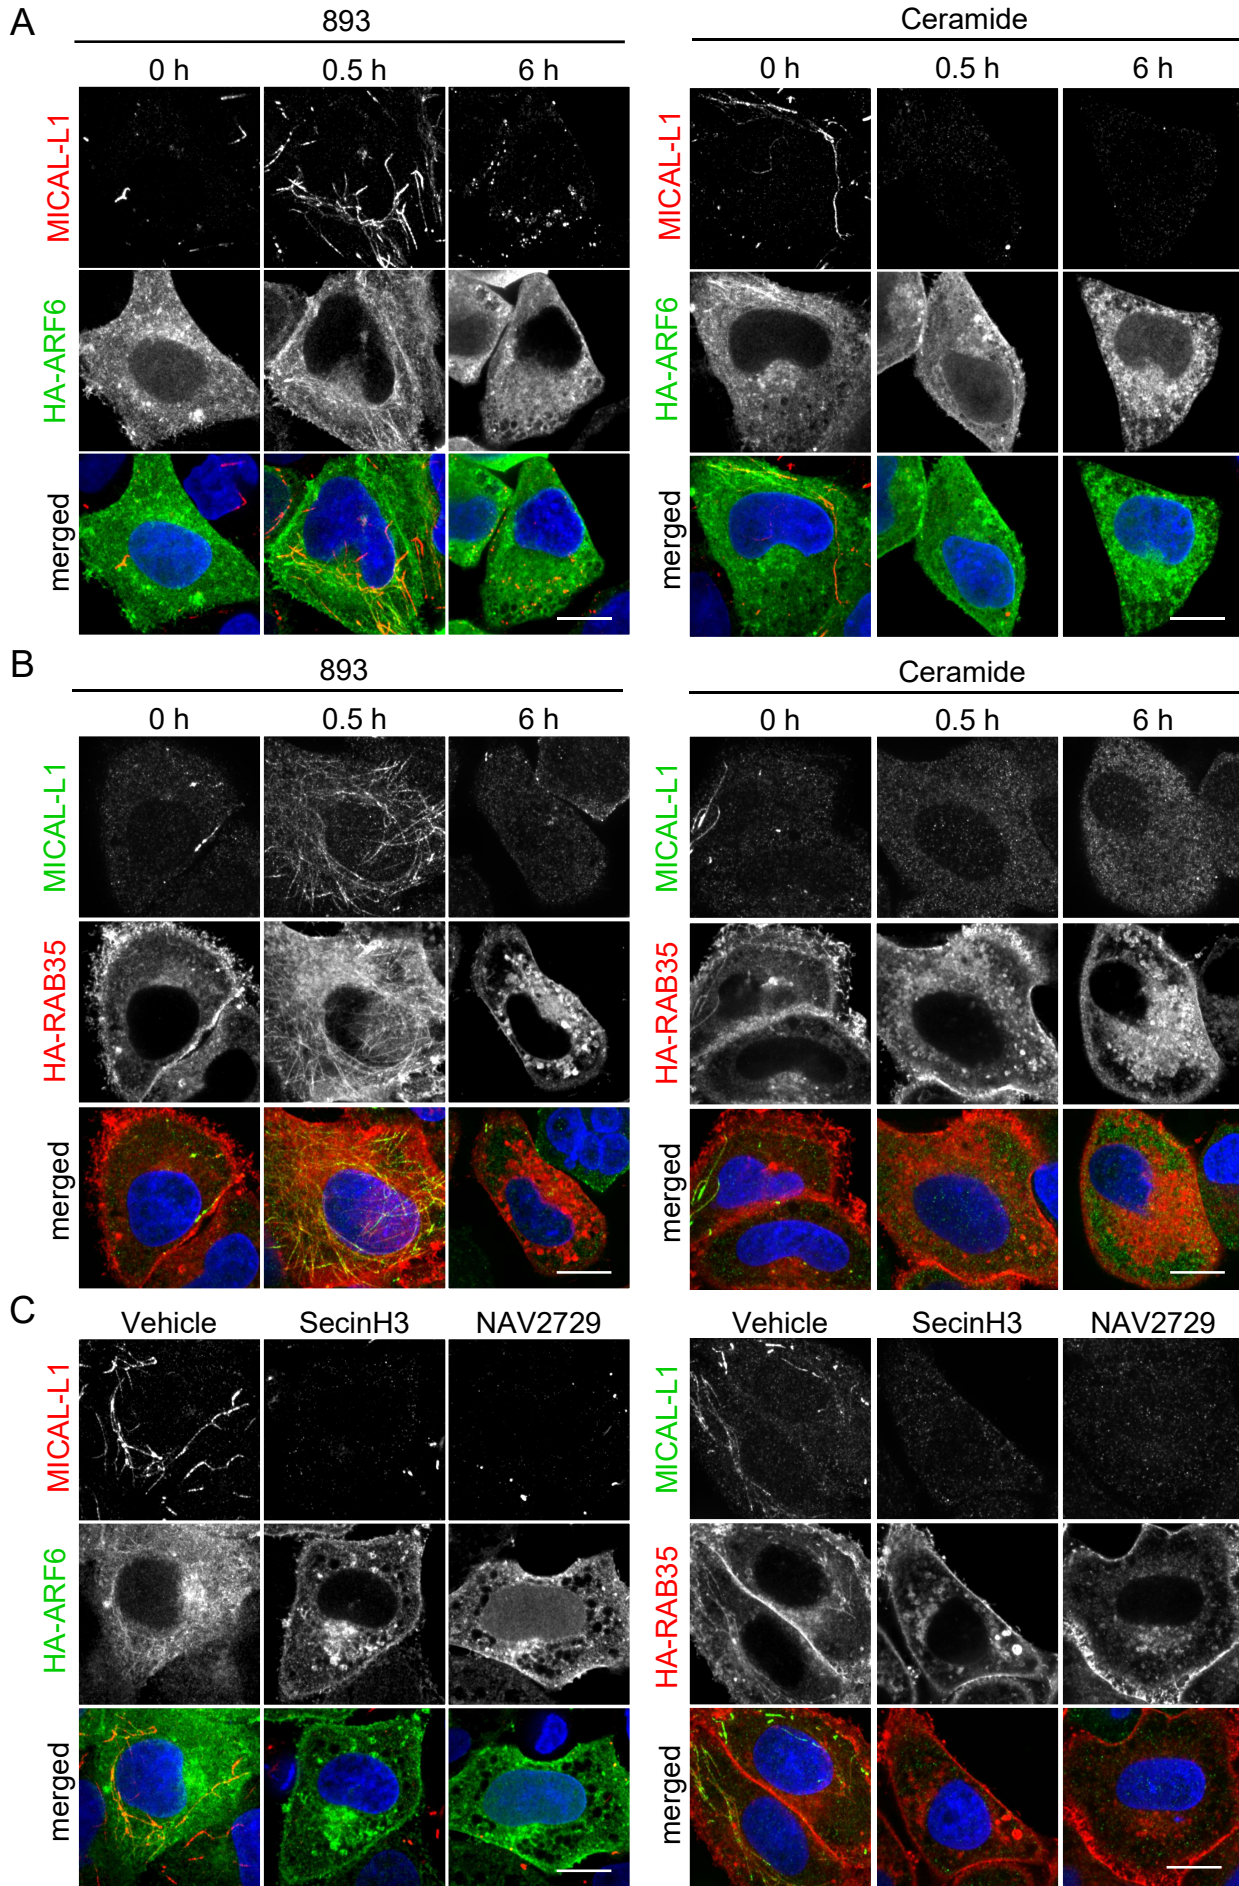

**Supplemental Figure 6: ARF6 inhibition by sphingolipids is sufficient to block recruitment of ARF6, RAB35, and their scaffold MICAL-L1 to the tubular recycling endosome. Related to Figure 6.** (A) HeLa cells transfected with HA-ARF6 were treated with 893 (10  $\mu$ M) or C<sub>2</sub>-ceramide (50  $\mu$ M) for 0.5 or 6 h and then stained for MICAL-L1 and HA tag. (B) HeLa cells transfected with HA-RAB35 were treated with 893(10  $\mu$ M) or C<sub>2</sub>-ceramide (50  $\mu$ M) for 0.5 or 6 h and then stained for MICAL-L1 and HA tag. (C) HeLa cells transfected with HA-ARF6 or HA-RAB35 were treated with SecinH3 (30  $\mu$ M) or NAV2729 (12.5  $\mu$ M) for 6 h and then stained for MICAL-L1 and HA tag. Scale bar, 10  $\mu$ m.

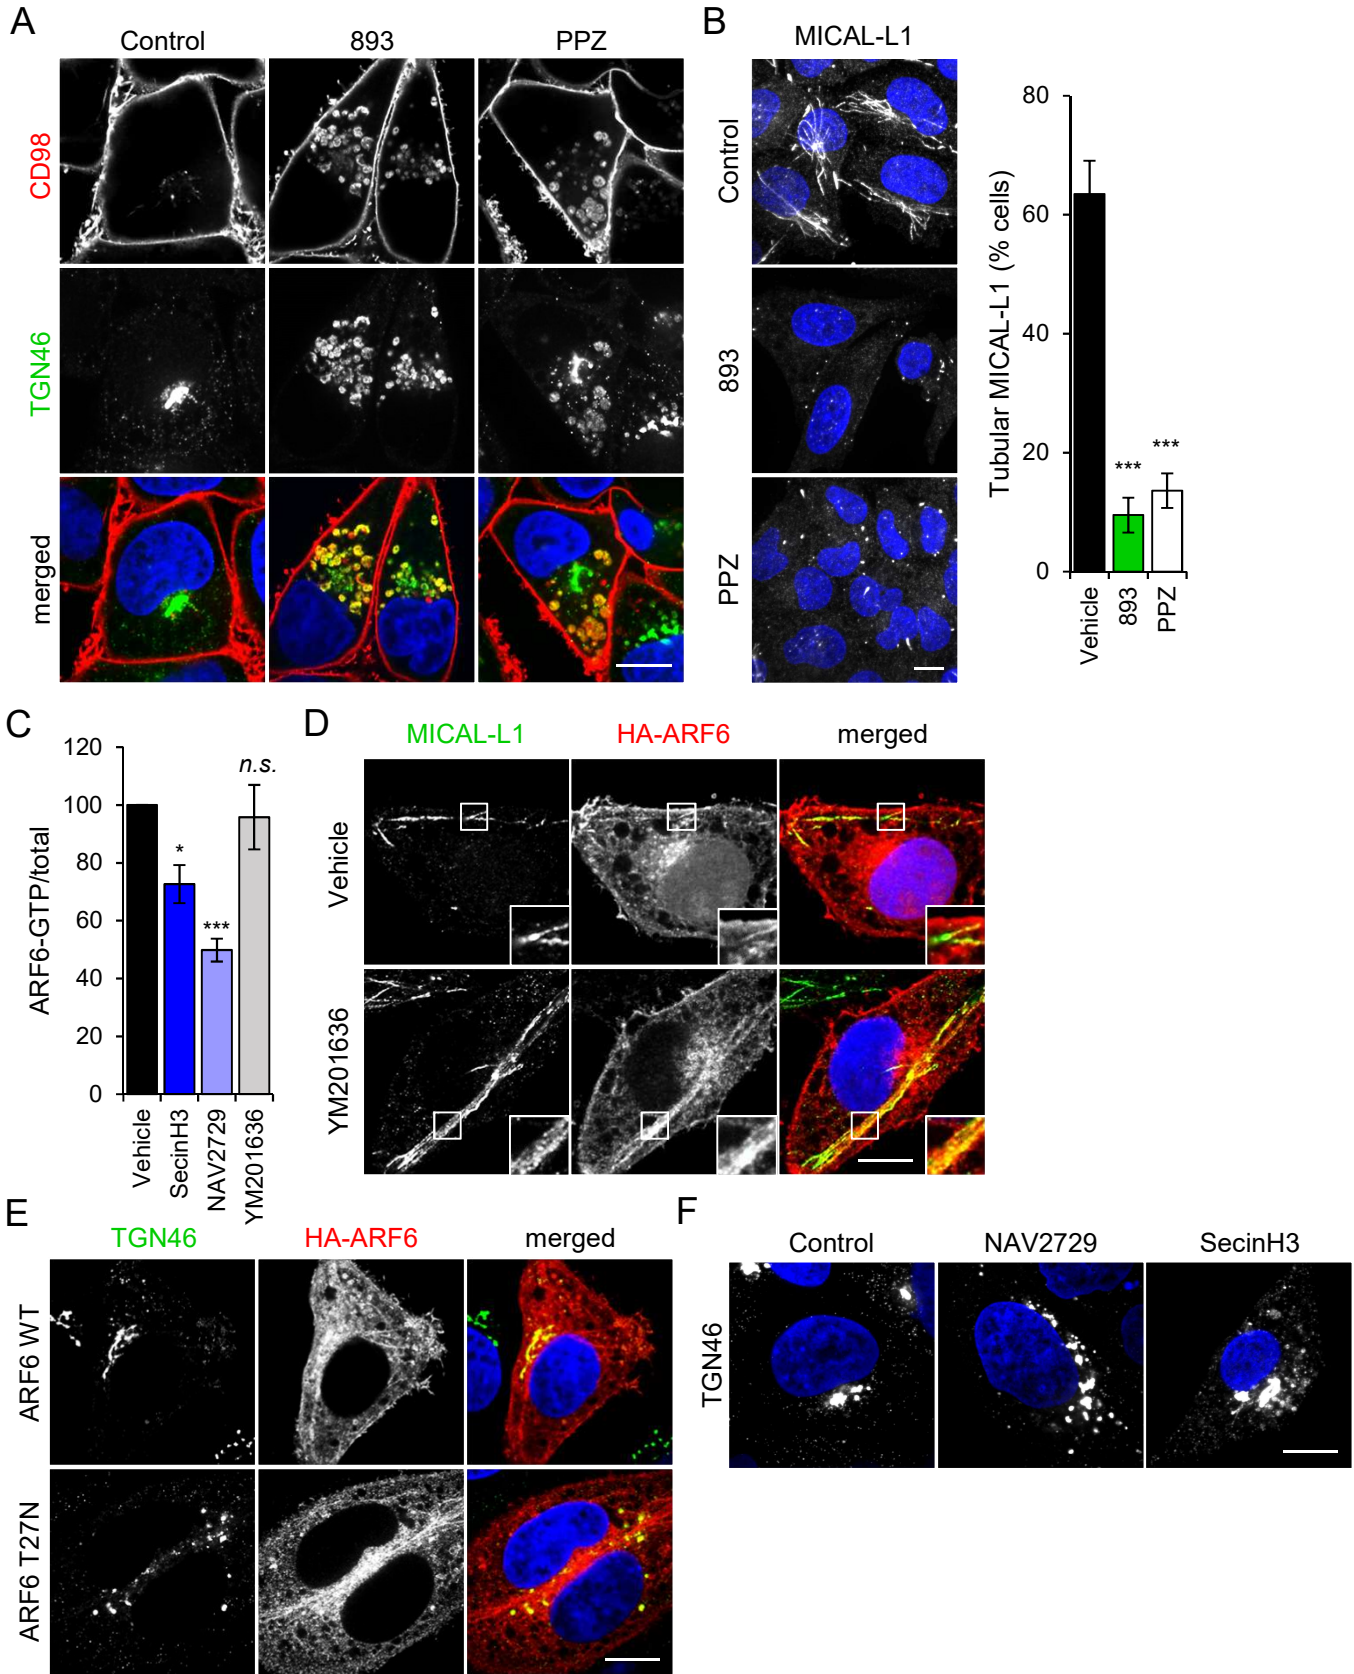



**Supplemental Figure 7: PP2A activation or ARF6 inhibition but not PIKfyve inhibition is sufficient to disrupt endocytic recycling. Related to Figure 6.** (A-B) HeLa cells were treated with 893 (10  $\mu$ M) or perphenazine (PPZ; 12.5  $\mu$ M) for 16 h and then stained for CD98 and TGN46 (A) or MICAL-L1 (B). The percent of cells per field of view with tubular MICAL-L1 staining is shown in (B). (C) ARF6-GTP normalized to total in HeLa cells treated with SecinH3 (30  $\mu$ M), NAV2729 (25  $\mu$ M), or YM201636 (800 nM) for 1 h. (D) HeLa cells transfected with HA-ARF6 were treated with YM201636 (800 nM) for 1 h and then stained for MICAL-L1 and HA tag. (E) HeLa cells transfected with HA-ARF6 wildtype (WT) or the dominant negative ARF6 mutant (HA-ARF6 T27N) were stained for TGN46 and HA tag. (F) HeLa cells were treated with SecinH3 (30  $\mu$ M) or NAV2729 (12.5  $\mu$ M) for 16 h and then stained for TGN46. Scale bar, 10  $\mu$ m. Means  $\pm$  SEM shown (B,C),  $n \geq 4$ . Using ordinary one-way ANOVA (B,C), n.s. = not significant; \* =  $p \leq 0.05$ ; \*\* =  $p \leq 0.01$ ; \*\*\* =  $p \leq 0.001$ . Dunnett's test was used to correct for multiple comparisons.
